# Supplementary material
Source: Elsevier journal article supplement (https://www.sciencedirect.com/science/article/pii/S0033833816301424)
Supplement: mmc2 [file S0033833816301424:mmc2.docx]

| **Droga** | **Mecanismo principal** | **Complicaciones agudas** | **Imagen funcional** | **Efectos a largo plazo** |
| --- | --- | --- | --- | --- |
| Cocaína | - Aumento de catecolaminas,serotonina y DA  - Efecto simpaticomimético (eleva la PA) | - Hemorragia (forma hidroclorada, HSA e HIP)  - Infarto isquémico  - SEPR  - Vasculitis | - Reducción 30% de la perfusión global  - *Craving*: hipermetabolismo en córtex orbitofrontal  - Crónico: incremento en cerebelo y descenso frontal y temporal | - Atrofia lóbulos frontales y temporales |
| Heroína | - Activación de receptores mu, kappa y delta | - Infarto isquémico (globo pálido)  - Leucopatía *(chasing the dragon)*  - Infección, abscesos intracraneales | - Aumento de FSCr en tronco del encéfalo, caudado, cíngulo…  - Descenso de FSCr en pacientes con leucopatía  - Descenso metabólico global 10% | - Atrofia con menos deterioro neurológico que con alcohol |
| MDMA | - Rápida liberación de 5-HT (serotonina)  - Aumento de DA y NA | - Hemorragia (aumento de la PA)  - Isquemia en globo pálido y córtex occipital  - SEPR | - PET: daño neuronas serotoninérgicas  - Disminución FSCr en córtex visual, caudado, parietal superior y regiones frontales dorsolaterales  - Disminución VSCr en región dorsolateral de córtex frontal, primera manifestación | - Incremento inicial de volumen del estriado (mecanismo compensador)  - Atrofia de córtex occipital, frontal, lóbulo temporal izquierdo y tronco del encéfalo  - Alteraciones neuropsiquiátricas |
| Alcohol | - Toxicidad directa: receptores NMDA, glutamato  - Metabolitos: Metanol, acetaldehído  - Déficit nutricional | - Encefalopatía de Wernicke (déficit de tiamina); alteración periventricular, periacueductal, cuerpos mamilares  - Psicosis de Korsakoff | - PET con FDG: descenso metabólico en córtex de asociación frontal y temporo-parieto-occipital en M-B | - M-B; alteración del cuerpo calloso  - EHC (hiperintensidad T1 en ganglios basales)  - Atrofia de lóbulo frontal, sustancia blanca, vermis cerebeloso |
| Cannabis | - Activación receptores CB1 por THC | - No relación directa establecida con ACV  - ACV isquémicos por mecanismos indirectos (hipotensión ortostática)  - Vasculitis  - Intoxicación | - Descenso de metabolismo cerebral (excepto cerebelo) que se normaliza con abstinencia  - Incremento de FSCr en intoxicación | - Alteraciones de comportamiento  - Esquizofrenia |
| Tolueno | - Rápida absorción  - Acumulación en cerebro (rico en lípidos) | - Euforia  - Cefalea  - Ataxia | - Alteración de la perfusión en el córtex en lóbulos frontal, parietal y temporal  - Hipoperfusión prefrontal | - Atrofia no específica  - Descenso NA  - Alteración del comportamiento |

**Tabla 2** Resumen de las principales drogas de abuso

ACV: accidente cerebrovascular; CB1: receptor cannabinoide tipo 1; DA: dopamina; EHC: encefalopatía hepática crónica; FDG: fluorodesoxiglucosa; FSCr: flujo sanguíneo cerebral relativo; HIP: hemorragia intraparenquimatosa; HSA: hemorragia subaracnoidea; M-B: enfermedad de Marchiafava-Bignami; NA: noradrenalina; NMDA: N-metil-D-aspartato; PA: presión arterial; SEPR: síndrome de encefalopatía posterior reversible; THC: tetrahidrocannabinol; VSCr: volumen sanguíneo cerebral relativo.
